# Supplementary material
Source: PubMed Central journal article supplement (PMC3406821)
Supplement: 1204951109_pnas.201204951SI.pdf [file 1204951109_pnas.201204951SI.pdf]

# Supporting Information

Kayukawa et al. 10.1073/pnas.1204951109

## SI Materials and Methods

**cDNA Cloning of *BmMet1*, *BmMet2*, and *BmSRC*.** Primers were designed for cloning cDNAs of *BmMet1*, *BmMet2*, and *BmSRC* by using information obtained from the *Bombyx mori* genome (Table S1). Fragments of these genes were amplified by PCR using first-strand cDNAs prepared from the prothoracic glands or epidermis of *B. mori* larvae and the RTPCR\_FW and RTPCR\_RV primers (Table S1). Their 5'- and 3'-end sequences were obtained by 5' RACE and 3' RACE with the 5' RACE and 3' RACE primers (Table S1), respectively, using a SMART RACE cDNA amplification kit (Clontech) and GeneRacer kit (Invitrogen). The full-length cDNA sequences of these genes then were obtained by combining the sequence data from the RT-PCR and RACE analyses. Their full ORFs were amplified by PCR from the cDNAs using the ORF\_F and ORF\_R primers (Table S1), subcloned into the pGEM-T Easy vector (Promega), and sequenced.

**Chemicals.** Juvenile hormones (JH) JH I and JH II were purchased from SciTech, and JH III was from Sigma-Aldrich. Methoprene (juvenile hormone analog [JHA]) was obtained from SDS Biotech, and farnesic acid and methyl farnesoate were from Echelon Biosciences. Aliquots of stock methanol solutions of these compounds were dried under a stream of nitrogen and dissolved in the culture medium by sonication. Cycloheximide was obtained from Sigma-Aldrich and dissolved in DMSO before use.

**Quantitative Real-Time PCR.** Quantitative real-time PCR (qPCR) analysis was performed essentially as described previously (1). Total RNA was extracted from *B. mori* tissues or cells by using an RNeasy Plus mini kit (Qiagen) and was used to synthesize cDNAs with a PrimeScript RT reagent kit (Takara Bio). The primers designed to amplify both isoforms of the promoter region of *B. mori* Krüppel homolog 1 gene (*BmKr-h1*) are shown in Table S2. *BmRp49* was used as the internal reference (Table S2). The reaction was carried out in a 10- $\mu$ L reaction volume containing template cDNA derived from 1 ng of total RNA, SYBR Premix Ex Taq (Takara Bio), and 0.2  $\mu$ M of each primer by using a LightCycler 480 real-time thermal cycler (Roche). The PCR conditions were 95 °C for 5 min and 55 cycles of 95 °C for 5 s and 60 °C for 20 s. The relative molarities of the gene transcripts were calculated by a crossing-point analysis using standard curves generated from a plasmid containing a fragment of each gene. The expression levels of *BmKr-h1 $\alpha$* , *BmKr-h1 $\beta$* , and *BmKr-h1* were normalized against those of *BmRp49*.

**Developmental Expression Profile of *BmKr-h1* in *B. mori* Larvae.** *B. mori* larvae (Kinsyu  $\times$  Showa strain) were reared at 25 °C under 12 h light/dark conditions. Larvae were sampled from day 0 of the third instar to day 6 of the fifth instar, and the epidermis of each larva was dissected. The level of *BmKr-h1* expression in the epidermis was measured by qPCR.

**Allatectomy and JHA Treatment.** Corpora allata were removed, using fine forceps under a microscope, from *B. mori* larvae (Kinsyu  $\times$  Showa strain) at day 0 of the fourth instar, and the larvae were allowed to recover for 3 h. Two microliters of an acetone solution of JHA (0.5  $\mu$ g/ $\mu$ L) or 2  $\mu$ L of acetone only was applied topically to the dorsal abdomen of the allatectomized larvae. After 12 h, the epidermis of each larva was dissected, and the level of *BmKr-h1* expression in the epidermis was measured by qPCR.

**Cell Culture.** The NIAS-Bm-aff3 cell line, derived from the fat body of *B. mori* (2, 3), was maintained at 25 °C in IPL-41 medium (Gibco, Invitrogen) containing 10% (vol/vol) FBS (Cell Culture Technologies). The HEK293 cell line was maintained at 37 °C in a 5% CO<sub>2</sub> atmosphere in minimum essential medium eagle (Sigma-Aldrich) supplemented with 10% FBS and nonessential amino acids (Gibco, Invitrogen).

**Construction of Reporter Plasmids.** Genomic DNA was extracted from a silkworm of the Daizo p50 strain using a conventional method (4). The 5'-flanking and first intron regions (–4741 to +968 or –4741 to +116) of *BmKr-h1* were amplified from the genomic DNA by using KOD FX DNA polymerase (Toyobo) with a forward primer containing attB1 and Kozak sequences (*BmKrh1Pro\_F*) and a reverse primer containing an attB2 sequence (*BmKrh1\_Pro\_R1* or *BmKrh1\_Pro\_R2*) (Table S3). The amplified PCR products were inserted into a pGL4.14 luciferase reporter plasmid (Promega) modified for the Gateway system according to the supplier's instructions (Invitrogen). A KOD Plus mutagenesis kit (Toyobo) was used for the construction of modified reporter plasmids. Reporter plasmids carrying deleted *BmKr-h1* 5'-flanking regions were constructed from plasmid pGL4.14\_–4741/+116 by inverse PCR with the appropriate *BmKrh1\_ProiPCR* primer sets (Table S3). Reporter plasmids carrying deleted *BmKr-h1* basal promoter regions and 3 $\times$  core region of the JH response element (JHRE) of *BmKr-h1* (*kJHREc*) were constructed from plasmid pGL4.14\_–2165/+116 and –49/+116 by inverse PCR with the appropriate *BmKrh1\_ProiPCR* primer sets (Table S3). For the construction of reporter plasmids carrying the *BmA3* or *Bmhsp70* promoter, the basal promoter region of *BmKr-h1* (–49 to +116) was removed from plasmid pGL4.14\_–2165/+116 & –49/+116 by inverse PCR with the *BmKrh1\_ProiPCR\_F13* and *BmKrh1\_ProiPCR\_R24* primers. The amplified fragment was ligated with the *BmA3* or *Bmhsp70* promoter DNA that was amplified by PCR from the plasmid pBacA3GAL4/3 $\times$ P3DsRed or pBacMCS hsp7GAL4/3 $\times$ P3DsRed (5) with the appropriate primer sets (Table S3). Reporter plasmids carrying mutated *BmKr-h1* 5'-flanking regions were constructed from plasmid pGL4.14\_–2165/+116 by inverse PCR with the appropriate *BmKrh1\_ProiPCR* primer sets (Table S4).

**Construction of Expression Plasmids.** To construct plasmids expressing the GAL4 DNA-binding domain (GAL4DBD) or VP16 activation domain (VP16AD) fused to the N terminus of *BmMet1*, *BmMet2*, or *BmSRC* in HEK293 cells, the full ORFs of the cDNAs were amplified by PCR from plasmids pGEMT\_ *BmMet1*, pGEMT\_ *BmMet2*, and pGEMT\_ *BmSRC*, respectively, by using the appropriate pBIND primers and pACT primers (Table S1). The amplified fragments were ligated into BamHI- and MluI-digested pBIND plasmids (Promega). A plasmid expressing GAL4DBD fused to the N terminus of VP16AD was constructed similarly (Table S1). To construct plasmids expressing native *BmMet2* and *BmSRC* in HEK293 cells, GAL4DBD was deleted from plasmids pBIND\_ *BmMet2* and pBIND\_ *BmSRC* by inverse PCR with the pBINDiPCR primers (Table S1). Plasmids for expressing *BmUSP*, *BmARNT*, *BmHIF-1 $\alpha$* , or *BmTimeless* in HEK293 cells were constructed as follows. The full ORFs of these cDNAs were amplified by PCR from full-length cDNA clones using the appropriate GW\_FW primers containing attB1 and Kozak sequences and GW\_RV primers containing an attB2 sequence (Table S1). The amplified

fragments were inserted into the pDONR 221 plasmid (Invitrogen) and then into the pcDNA3.2/V5-DEST vector (Invitrogen).

**Analysis of JHRE in *Kr-h1* Homologs of Other Insect Species.** Genomic databases of *Tribolium castaneum*, *Apis mellifera*, *Nasonia vitripennis*, *Acyrtosiphon pisum*, and *Drosophila melanogaster* were

searched for *Kr-h1* homologs with the tblastn program (<http://blast.ncbi.nlm.nih.gov/>) by using the BmKr-h1 sequence as the query (GenBank accession no. BAJ05087). The sequences of the start sites of transcription or translation in *Kr-h1* were used to identify putative *kJHREc* sequences from 5'-flanking regions.

1. Shinoda T, Itoyama K (2003) Juvenile hormone acid methyltransferase: A key regulatory enzyme for insect metamorphosis. *Proc Natl Acad Sci USA* 100:11986–11991.
2. Imanishi S, Akiduki G, Haga A (2002) Novel insect primary culture method by using newly developed media and extra cellular matrix. *In vitro Cell Dev Biol* 38:16-A.
3. Takahashi T, et al. (2006) Calreticulin is transiently induced after immunogen treatment in the fat body of the silkworm *Bombyx mori*. *J Insect Biotechnol Sericology* 75:79–84.
4. Sambrook J, Fritsch EF, Maniatis T (1989) *Molecular Cloning: A Laboratory Manual* (Cold Spring Harbor Laboratory, Cold Spring Harbor, NY), Vol 2, pp 9.14–9.19.
5. Uchino K, et al. (2006) Evaluating promoter sequences for trapping an enhancer activity in the silkworm *Bombyx mori*. *J Insect Biotechnol Sericology* 75:89–97.

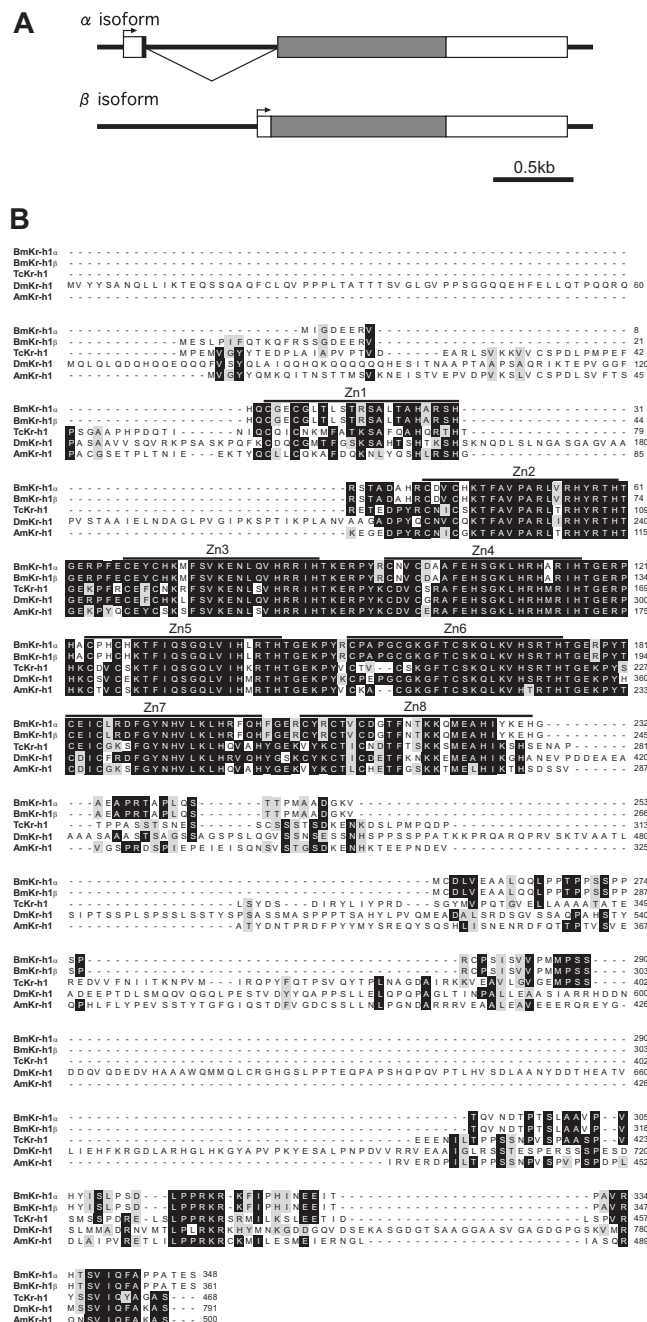

**Fig. S1. (A)** Schematic representation of the genomic structure of *BmKr-h1* and alignment of Kr-h1 sequences from other insect species. Genomic structures of *BmKr-h1α* and *BmKr-h1β*. Putative exons are boxed, and ORFs are shaded. Arrows indicate predicted transcription start sites. **(B)** Alignment of predicted amino acid sequences of *BmKr-h1α* and *BmKr-h1β* with the sequences of *T. castaneum* Kr-h1 (TcKr-h1, GenBank accession no. NP\_001129235), *D. melanogaster* Kr-h1 (DmKr-h1, GenBank accession no. NP\_477467), and *A. mellifera* Kr-h1 (AmKr-h1, GenBank accession no. AB642243). Black and light gray shading indicate identical and similar amino acid residues, respectively. The eight C<sub>2</sub>H<sub>2</sub> zinc finger domains are indicated by the symbol “Zn.”

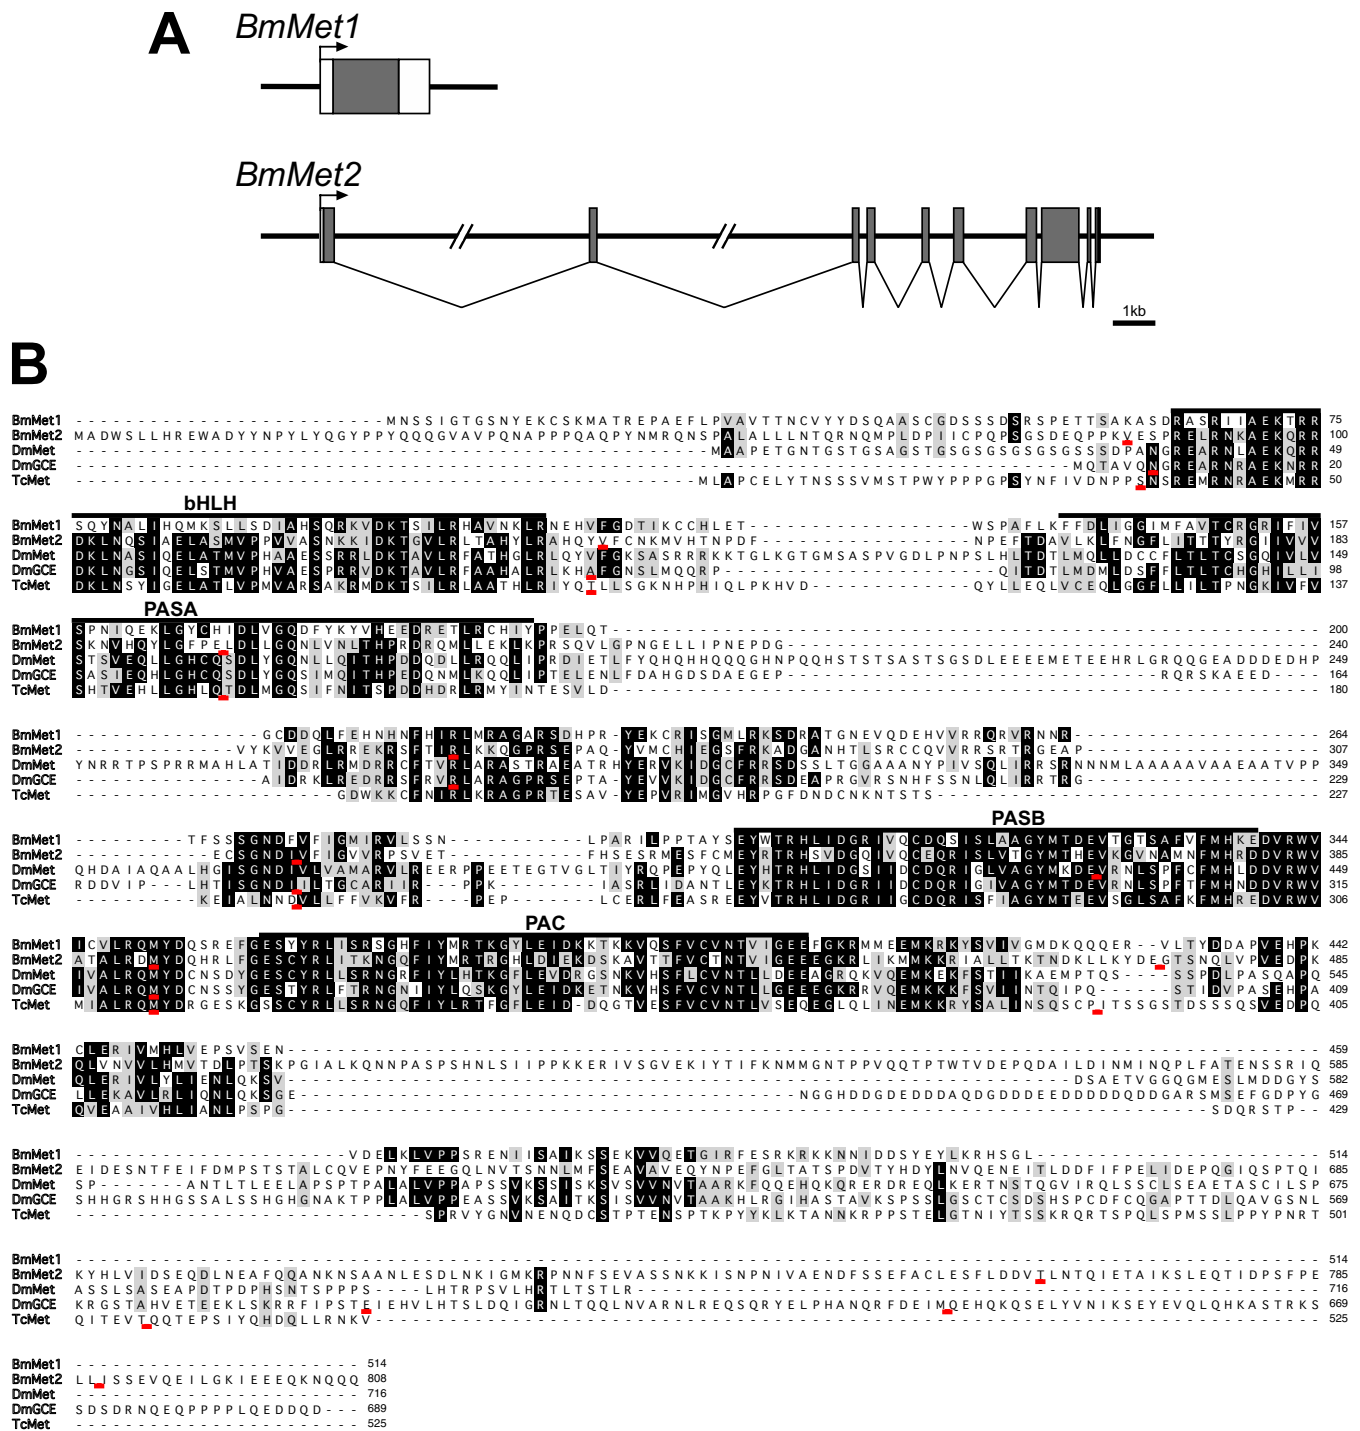

**Fig. S2.** Schematic representation of the genomic structures of *BmMet1* and *BmMet2* (A) and alignment of Met sequences from other insect species (B). (A) Genomic structures of *BmMet1* and *BmMet2*. Putative exons are boxed, and ORFs are shaded. (B) Alignment of the predicted amino acid sequences of *BmMet1* and *BmMet2* with the sequences of *D. melanogaster* Met (*DmMet*, GenBank accession no. NP\_511126) and GCE (*DmGCE*, GenBank accession no. NP\_511160) and *T. castaneum* Met (*TcMet*, GenBank accession no. BAG71980). Black and light gray shading indicate identical and similar amino acid residues, respectively. The bHLH, PASA, PASB, and PAC domains (1) are indicated. Red bars mark the positions of introns in the ORFs. The positions of introns were inferred from the insect genomic databases KAIKObase (<http://snp.dna.affrc.go.jp/KAIKObase/>), BeetleBase (<http://beetlebase.org/>), and FlyBase (<http://flybase.org/>).

1. Baumann A, Fujiwara Y, Wilson TG (2010) Evolutionary divergence of the paralogs *Methoprene tolerant* (*Met*) and *germ cell expressed* (*gce*) within the genus *Drosophila*. *J Insect Physiol* 56:1445–1455.





**Table S1. List of primers used for cDNA cloning and construction of expression plasmids**

| Plasmid name         | Construction method | PCR template                                  | Primer name         | Nucleotide sequence (5' to 3')                         |
|----------------------|---------------------|-----------------------------------------------|---------------------|--------------------------------------------------------|
| pGEMT_BmMet1_RT-PCR  | PCR, ligation       | 5' SMART RACE cDNA (fifth prothoracic glands) | BmMet1_RT-PCR_FW    | ATGAACCTGCTCTATTGGGACAGGATCGAAT                        |
|                      |                     |                                               | BmMet1_RT-PCR_RV    | TTACAATCCACTGTGCTTTTTAAATACTCATAGCTG                   |
| pGEMT_BmMet1_5'RACE  | 5'-SMART RACE       | 5' SMART RACE cDNA (fifth prothoracic glands) | BmMet1_5'RACE       | CGTGAATCTGAAGAAGTCTCCGCAG                              |
| pGEMT_BmMet1_3'RACE  | 3'-SMART RACE       | 3' SMART RACE cDNA (fifth prothoracic glands) | BmMet1_3'RACE       | TCCAAAGTGTCTTGGAGCGGATTTGTAATG                         |
| pGEMT_BmMet1_ORF     | PCR, ligation       | cDNA                                          | BmMet1_ORF_FW       | ATGAACCTGCTCTATTGGGACAGGATCGAAT                        |
|                      |                     |                                               | BmMet1_ORF_RV       | TTACAATCCACTGTGCTTTTTAAATACTCATAGCTG                   |
| pDONR_BmMet1         | PCR, Gateway system | pGEMT_BmMet1                                  | BmMet1_GW_FW        | AAAAAGCAGCTTCGAAAGGATAGAACCAATGAACCTCGTCTATTGGGAC      |
|                      |                     |                                               | BmMet1_GW_RV        | AGAAAAGCTGGTCTTACAAATCCACTGTGCTTTT                     |
| pBIND_BmMet1         | PCR, ligation       | pGEMT_BmMet1                                  | BmMet1_pBIND_FW     | TTTTGGATCCGAATGAACCTGCTCTATTGGGACAGGA                  |
|                      |                     |                                               | BmMet1_pBIND_RV     | AAAAAGCTGGTCTTACAAATCCACTGTGCTTTTAAAFAC                |
| pGEMT_BmMet2_RT-PCR  | PCR, ligation       | cDNA                                          | BmMet2_RT-PCR_FW    | AACCTGTGAAATCTGACTCATCCG                               |
|                      |                     |                                               | BmMet2_RT-PCR_RV    | CGCTTTCCCTCCTCTTCCCAATAA                               |
| pGEMT_BmMet2_5'RACE  | 5'-SMART RACE       | 5' SMART RACE cDNA (fifth prothoracic glands) | BmMet2_5'RACE       | GGTCCCTGCTTCTTCAACCTGATGG                              |
| pGEMT_BmMet2_3'RACE  | 3'-SMART RACE       | 3' SMART RACE cDNA (fifth prothoracic glands) | BmMet2_3'RACE       | GCGAACAGGCTATCTCGTTGGTAC                               |
| pGEMT_BmMet2_ORF     | PCR, ligation       | cDNA                                          | BmMet2_ORF_FW       | ATGGCTGATTTGGTCTCTGCTGCACC                             |
|                      |                     |                                               | BmMet2_ORF_RV       | TTATTTGTTGTTGGTTTTCTTCTCTCTCTTC                        |
| pDONR_BmMet2         | PCR, Gateway system | pGEMT_BmMet2                                  | BmMet2_GW_FW        | AAAAAGCAGCTTCGAAAGGATAGAACCAATGAACCTCGTCTATTGGTCTCTGCT |
|                      |                     |                                               | BmMet2_GW_RV        | AGAAAAGCTGGTCTTATTTGTTGGTTTTCTT                        |
| pBIND_BmMet2         | PCR, ligation       | pGEMT_BmMet2                                  | BmMet2_pBIND_FW     | TTTTGGATCCGAATGAACCTGCTCTCTGCTGCTG                     |
|                      |                     |                                               | BmMet2_pBIND_RV     | AAAAAGCTGGTCTTATTTGTTGGTTTTCTTCTCTCT                   |
| pBIND_BmMet2ΔGAL4DBD | Inverse PCR         | pBIND_BmMet2                                  | BmMet2_pBINDiPCR_FW | ATGGCTGATTTGGTCTCTGCTGCACCG                            |
|                      |                     |                                               | BmMet2_pBINDiPCR_RV | CTTTTCAAGAGGCTTCTCAAGCTGGC                             |
| pACT_BmMet2          | PCR, ligation       | pGEMT_BmMet2                                  | BmMet2_pACT_FW      | TTTTGGATCCGAATGAACCTGCTCTCTGCTGCTG                     |
|                      |                     |                                               | BmMet2_pACT_RV      | AAAAAGCTGGTCTTATTTGTTGGTTTTCTTCTCTCT                   |
| pBIND_VP16AD         | PCR, ligation       | pACT (Promega)                                | VP16AD_pBIND_FW     | TTTTGGATCCGAATGAACCTGCTCTCTGCTGCTG                     |
|                      |                     |                                               | VP16AD_pBIND_RV     | AAAAAGCTGGTCTTATTTGTTGGTTTTCTTCTCTCT                   |
| pGEMT_BmSRC_RT-PCR   | PCR, ligation       | RLM RACE cDNA (epidermis)                     | BmSRC_RT-PCR_FW     | AAATATATCTTATCCCGGACCCCGGGAAT                          |
|                      |                     |                                               | BmSRC_RT-PCR_RV     | GGCACTCAACATACACCAATAACCTCGG                           |
| pGEMT_BmSRC_5'RACE   | RLM RACE            | RLM RACE cDNA (epidermis)                     | BmSRC_5'RACE_RV1    | CCAGTTGAAAGATTTGATTTCTTAAGTAACGGTC                     |
|                      |                     |                                               | BmSRC_5'RACE_RV2    | GTTTTCCGATGATCTTCTCATGTAATAATGAAATATCG                 |
| pGEMT_BmSRC_3'RACE   | RLM RACE            | RLM RACE cDNA (epidermis)                     | BmSRC_3'RACE_FW1    | CCATATAGTTCCTGTTCTTTCGTTGAAATAAACTCC                   |
|                      |                     |                                               | BmSRC_3'RACE_FW2    | GGTTTTTATTTGAAATTAATCGAAAGGTGAAATAGAGTG                |
| pGEMT_BmSRC_ORF      | PCR, ligation       | BmSRC_3'RACE first PCR product cDNA           | BmSRC_ORF_FW        | GTATCAGATAATCAAGGAGTTTATTTCTTCAGAAAGAAC                |
|                      |                     |                                               | BmSRC_ORF_RV        | ATGCTCCCGTGGTTCATCCCGAGCC                              |
| pDONR_BmSRC          | PCR, Gateway system | pGEMT_BmSRC                                   | BmSRC_GW_FW         | TCACCGTCCCGCCCTCCGG                                    |
|                      |                     |                                               | BmSRC_GW_RV         | AAAAAGCAGCTTCGAAAGGATAGAACCAATGCTGCCCCGTGTTCAATCC      |
| pBIND_BmSRC          | PCR, ligation       | pGEMT_BmSRC                                   | BmSRC_pBIND_FW      | AGAAAAGCTGGTCTCACCTCCCGCCGCTCC                         |
|                      |                     |                                               | BmSRC_pBIND_RV      | TTTTGGATCCGATGCTGCCCGCTGGTTCATCC                       |
| pBIND_BmSRCΔGAL4DBD  | Inverse PCR         | pBIND_BmSRC                                   | BmSRC_pBINDiPCR_FW  | AAAAAGCTGGTCTCACCTCCCGCCGCTCC                          |
|                      |                     |                                               | BmSRC_pBINDiPCR_RV  | ATGCTCCCGTGGTTCATCCCGAGCC                              |
| pACT_BSRC            | PCR, ligation       | pGEMT_BmSRC                                   | BmSRC_pACT_FW       | CTTTTCAAGAGGCTTGGTTCATCCCGAGCC                         |
|                      |                     |                                               | BmSRC_pACT_RV       | TTTTGGATCCGATGCTGCCCGTGGTTCATCC                        |
| pDONR_BmUSP          | PCR, Gateway system | Full-length cDNA clone (fwdP12_FL5_C16)       | BmUSP_GW_FW         | AAAAAGCTGGTCTCACCTCCCGCCGCTCC                          |
|                      |                     |                                               | BmUSP_GW_RV         | AAAAAGCAGCTTNNATGTCGAGCGTGGCGGAAGAA                    |
| pDONR_BmARNT         | PCR, Gateway system | Full-length cDNA clone (fmaV30399)            | BmARNT_GW_FW        | AGAAAAGCTGGTCTCACCTCCCGCCGCTCC                         |
|                      |                     |                                               | BmARNT_GW_RV        | AAAAAGCAGCTTNNATGTCGAGCGTGGTTCGCA                      |
| pDONR_BmHIF-1α       | PCR, Gateway system | Full-length cDNA clone (fprW24_F_E04)         | BmARNT_GW_FW        | AGAAAAGCTGGTCTCACCTCCCGCCGCTCC                         |
|                      |                     |                                               | BmHIF-1α_GW_RV      | AGAAAAGCTGGTCTCACCTCCCGCCGCTCC                         |
| pDONR_BmTimeless     | PCR, Gateway system | Full-length cDNA clone (fdpeP16_F_G06)        | BmHIF-1α_GW_FW      | AAAAAGCAGCTTNNATGTCGAGCGTGGCGGAAGAA                    |
|                      |                     |                                               | BmTimeless_GW_RV    | AAAAAGCAGCTTNNATGTCGAGCGTGGCGGAAGAA                    |







**Table S4. List of primers used for construction of mutated reporter plasmids**

| Reporter plasmid name  | Primer name        | Nucleotide sequence (5' to 3')        |
|------------------------|--------------------|---------------------------------------|
| pGL4.14_-2165/+116_M1  | BmKrh1_ProiPCR_F25 | CAAAAAAGGGAGACGGCGAGAGGAGTTGAG        |
|                        | BmKrh1_ProiPCR_R1  | ATCCTCGAGGCTAGCGAGCTCAGGTAC           |
| pGL4.14_-2165/+116_M2  | BmKrh1_ProiPCR_F31 | CAAAAATGGGGAGACGGCGAGAGGAGTTGAG       |
|                        | BmKrh1_ProiPCR_R1  | ATCCTCGAGGCTAGCGAGCTCAGGTAC           |
| pGL4.14_-2165/+116_M3  | BmKrh1_ProiPCR_F32 | CAAGTAAAGGGAGACGGCGAGAGGAGTTGAG       |
|                        | BmKrh1_ProiPCR_R1  | ATCCTCGAGGCTAGCGAGCTCAGGTAC           |
| pGL4.14_-2165/+116_M4  | BmKrh1_ProiPCR_F26 | TTTGCGCTCTGTTGTTGAGAGTTCACACGC        |
|                        | BmKrh1_ProiPCR_R16 | CGTAGACTCAACTCCTCTCGCCGTC             |
| pGL4.14_-2165/+116_M5  | BmKrh1_ProiPCR_F27 | TTTTTGCGCGCTTCGAAACCGCGGTG            |
|                        | BmKrh1_ProiPCR_R17 | AACTCTCAACAACAGAGCGCGTGCG             |
| pGL4.14_-2165/+116_M6  | BmKrh1_ProiPCR_F33 | TTTACGCGCGCTTCGAAACCGCGGTG            |
|                        | BmKrh1_ProiPCR_R17 | AACTCTCAACAACAGAGCGCGTGCG             |
| pGL4.14_-2165/+116_M7  | BmKrh1_ProiPCR_F34 | CATTTGCGCGCTTCGAAACCGCGGTG            |
|                        | BmKrh1_ProiPCR_R17 | AACTCTCAACAACAGAGCGCGTGCG             |
| pGL4.14_-2165/+116_M8  | BmKrh1_ProiPCR_F28 | AAAGGCCTCCACGTGTGCAACGCTAC            |
|                        | BmKrh1_ProiPCR_R18 | CGCGGTTTCGAAGCGCGGTGT                 |
| pGL4.14_-2165/+116_M9  | BmKrh1_ProiPCR_F29 | TTTAAACGAACGCTACCGCTTGCCCCAC          |
|                        | BmKrh1_ProiPCR_R19 | GAGGCCACCGCGGTTTCGAAG                 |
| pGL4.14_-2165/+116_M10 | BmKrh1_ProiPCR_F35 | TTTGTGTGCAACGCTACCGCTTGCCCCAC         |
|                        | BmKrh1_ProiPCR_R19 | GAGGCCACCGCGGTTTCGAAG                 |
| pGL4.14_-2165/+116_M11 | BmKrh1_ProiPCR_F36 | CACAAAACGAACGCTACCGCTTGCCCCAC         |
|                        | BmKrh1_ProiPCR_R19 | GAGGCCACCGCGGTTTCGAAG                 |
| pGL4.14_-2165/+116_M12 | BmKrh1_ProiPCR_F30 | TTTCCCATCTCCTTCACACCCGC               |
|                        | BmKrh1_ProiPCR_R20 | GGGCAAGCGGTAGCGTTCGACAC               |
| pGL4.14_-2165/+116_M13 | BmKrh1_ProiPCR_F13 | CGCGAGCATTCCGGCCCGGA                  |
|                        | BmKrh1_ProiPCR_R21 | GCGAAAAAAGGAGATGGGGTGGGGCAAGCG        |
| pGL4.14_-2165/+116_M14 | BmKrh1_ProiPCR_F13 | CGCGAGCATTCCGGCCCGGA                  |
|                        | BmKrh1_ProiPCR_R22 | GCGAAATGAAGGAGATGGGGTGGGGCAAGCG       |
| pGL4.14_-2165/+116_M15 | BmKrh1_ProiPCR_F13 | CGCGAGCATTCCGGCCCGGA                  |
|                        | BmKrh1_ProiPCR_R23 | GCGGTAAAAGGAGATGGGGTGGGGCAAGCG        |
| pGL4.14_-2165/+116_M16 | BmKrh1_ProiPCR_F37 | CAAGTGTGGGTTTACGGCGAGAGGAGTTGAGTCTACG |
|                        | BmKrh1_ProiPCR_R1  | ATCCTCGAGGCTAGCGAGCTCAGGTAC           |
| pGL4.14_-2165/+116_M17 | BmKrh1_ProiPCR_F38 | TTTAGGAGTTGAGTCTACGACCGCTC            |
|                        | BmKrh1_ProiPCR_R25 | GCCGTCTCCCCACACTTG                    |
| pGL4.14_-2165/+116_M18 | BmKrh1_ProiPCR_F39 | TTTTTGTAGTCTACGACCGCTCTGTTGTTG        |
|                        | BmKrh1_ProiPCR_R26 | CTCTCGCGTCTCCCCACACTTG                |
| pGL4.14_-2165/+116_M19 | BmKrh1_ProiPCR_F40 | TTTTTCTACGCACGCGCTCTGTTGTTGAGAG       |
|                        | BmKrh1_ProiPCR_R27 | AACTCCTCTCGCGTCTCCCCACA               |
| pGL4.14_-2165/+116_M20 | BmKrh1_ProiPCR_F41 | AAATGTTGTTGAGAGTTCACACGCGCGCTTC       |
|                        | BmKrh1_ProiPCR_R28 | CGCGTGCCTAGACTCAACTCCTCTC             |
| pGL4.14_-2165/+116_M21 | BmKrh1_ProiPCR_F42 | TTTTTTTTCACACGCGCGCTTCGAAACCGC        |
|                        | BmKrh1_ProiPCR_R29 | AACAACAGAGCGCGTGCCTAGACTCAA           |

**Table S4. Cont.**

| Reporter plasmid name             | Primer name        | Nucleotide sequence (5' to 3')              |
|-----------------------------------|--------------------|---------------------------------------------|
| pGL4.14_-2165/+116_M22            | BmKrh1_ProiPCR_F43 | AAACACGTGTGCGAACGCTACCGCTTGC                |
|                                   | BmKrh1_ProiPCR_R30 | GCCCACCGCGGTTTCGAAGCGC                      |
| pGL4.14_-2165/+116_M23            | BmKrh1_ProiPCR_F13 | CGCGAGCATTCCGGCCCGGA                        |
|                                   | BmKrh1_ProiPCR_R36 | GCGGTGTGAAGTTTATGGGTGGGGCAAGCGGTAGC         |
| pGL4.14_-2165/+116_M24            | BmKrh1_ProiPCR_F44 | CAAGTGTGGGAGACGTTTAGAGGAGTTGAGTCTACGCACGCGC |
|                                   | BmKrh1_ProiPCR_R1  | ATCCTCGAGGCTAGCGAGCTCAGGTAC                 |
| pGL4.14_-2165/+116_M25            | BmKrh1_ProiPCR_F45 | TTTACGCGCTCTGTGTGTGAGAGTTACACACGCGCGC       |
|                                   | BmKrh1_ProiPCR_R31 | TAGACTCAACTCCTCTCGCCGTCTCC                  |
| pGL4.14_-2165/+116_M26            | BmKrh1_ProiPCR_F46 | CGCATTTTTTCTGTGTGTGAGAGTTACACACGCGCGC       |
|                                   | BmKrh1_ProiPCR_R31 | TAGACTCAACTCCTCTCGCCGTCTCC                  |
| pGL4.14_-2165/+116_M27            | BmKrh1_ProiPCR_F47 | TTTTTTTTTTCGAAACCGCGGTGGGCCTCCA             |
|                                   | BmKrh1_ProiPCR_R32 | TGTGAACTCTCAACAACAGAGCGCGTG                 |
| pGL4.14_-2165/+116_M28            | BmKrh1_ProiPCR_F48 | TTTTGTGGCCTCCACGTGTGCAACG                   |
|                                   | BmKrh1_ProiPCR_R33 | GTTCGAAGCGCGGTGTGAACTCTC                    |
| pGL4.14_-2165/+116_M29            | BmKrh1_ProiPCR_F49 | TTTACCCTTGCCCCACCCATCTCC                    |
|                                   | BmKrh1_ProiPCR_R34 | TTCGACACGTGGAGGCCACCG                       |
| pGL4.14_-2165/+116_M30            | BmKrh1_ProiPCR_F50 | TTTTTGCCCCACCCATCTCCTTTCACAC                |
|                                   | BmKrh1_ProiPCR_R35 | GTAGCGTTCGACACGTGGAGGCC                     |
| pGL4.14_-2165/+116_M31            | BmKrh1_ProiPCR_F13 | CGCGAGCATTCCGGCCCGGA                        |
|                                   | BmKrh1_ProiPCR_R37 | AAAGTGTGAAGGAGATGGGTGGGGCAA                 |
| pGL4.14_-2165/+116_transversion 1 | BmKrh1_ProiPCR_F59 | TGTGGCCTCCACGTGTGCAACGCTAC                  |
|                                   | BmKrh1_ProiPCR_R18 | CGCGGTTTCGAAGCGCGGTGT                       |
| pGL4.14_-2165/+116_transversion 2 | BmKrh1_ProiPCR_F60 | TTACTCCACGTGTGCAACGCTACCGCTT                |
|                                   | BmKrh1_ProiPCR_R39 | CACCGCGGTTTCGAAGCGCGCG                      |
| pGL4.14_-2165/+116_transversion 3 | BmKrh1_ProiPCR_F61 | AGACACGTGTGCAACGCTACCGCTTGC                 |
|                                   | BmKrh1_ProiPCR_R30 | GCCCACCGCGGTTTCGAAGCGC                      |
| pGL4.14_-2165/+116_transversion 4 | BmKrh1_ProiPCR_F62 | ACAGTGTGCAACGCTACCGCTTGCCCCAC               |
|                                   | BmKrh1_ProiPCR_R19 | GAGGCCACCGCGGTTTCGAAG                       |
| pGL4.14_-2165/+116_transversion 5 | BmKrh1_ProiPCR_F63 | CACGTGTCGAACGCTACCGCTTGCCCCAC               |
|                                   | BmKrh1_ProiPCR_R19 | GAGGCCACCGCGGTTTCGAAG                       |
| pGL4.14_-2165/+116_transversion 6 | BmKrh1_ProiPCR_F64 | GATAACGCTACCGCTTGCCCCACCC                   |
|                                   | BmKrh1_ProiPCR_R40 | CACGTGGAGGCCACCGCGGTT                       |
| pGL4.14_-2165/+116_transition 1   | BmKrh1_ProiPCR_F65 | ACAGGCCTCCACGTGTGCAACGCTAC                  |
|                                   | BmKrh1_ProiPCR_R18 | CGCGGTTTCGAAGCGCGGTGT                       |
| pGL4.14_-2165/+116_transition 2   | BmKrh1_ProiPCR_F66 | AATCTCCACGTGTGCAACGCTACCGCTT                |
|                                   | BmKrh1_ProiPCR_R39 | CACCGCGGTTTCGAAGCGCGCG                      |
| pGL4.14_-2165/+116_transition 3   | BmKrh1_ProiPCR_F67 | TCTCACGTGTGCAACGCTACCGCTTGC                 |
|                                   | BmKrh1_ProiPCR_R30 | GCCCACCGCGGTTTCGAAGCGC                      |
| pGL4.14_-2165/+116_transition 4   | BmKrh1_ProiPCR_F68 | TGTGTGTGCAACGCTACCGCTTGCCCCAC               |
|                                   | BmKrh1_ProiPCR_R19 | GAGGCCACCGCGGTTTCGAAG                       |
| pGL4.14_-2165/+116_transition 5   | BmKrh1_ProiPCR_F69 | CACACATCGAACGCTACCGCTTGCCCCAC               |
|                                   | BmKrh1_ProiPCR_R19 | GAGGCCACCGCGGTTTCGAAG                       |
| pGL4.14_-2165/+116_transition 6   | BmKrh1_ProiPCR_F70 | CTAAACGCTACCGCTTGCCCCACCC                   |
|                                   | BmKrh1_ProiPCR_R40 | CACGTGGAGGCCACCGCGGTT                       |

Red letters indicate mutated nucleotides.
